# Supplementary material for: Exceptional mechano-electronic properties in the HfN2 monolayer: a promising candidate in low-power flexible electronics, memory devices and photocatalysis
Source: Royal Society of Chemistry journal article supplement (doi:10.1039/d0cp02999h), 2020-01-01
Supplement: d0cp02999h1.pdf [file d0cp02999h1.pdf]

## Electronic Supplementary Information (ESI)

Exceptional electronic and mechanical properties in HfN<sub>2</sub> monolayer: promising candidate in low-power nano, flexible electronics, memory devices and photocatalysis

Manish Kumar Mohanta<sup>†</sup>, Fathima I.S.<sup>†</sup> and Abir De Sarkar<sup>\*</sup>

Institute of Nano Science and Technology, Phase 10, Sector 64, Mohali, Punjab-160062, India

\*E-mail: abir@inst.ac.in; abirdesarkar@gmail.com

<sup>†</sup> Both the authors contributed equally

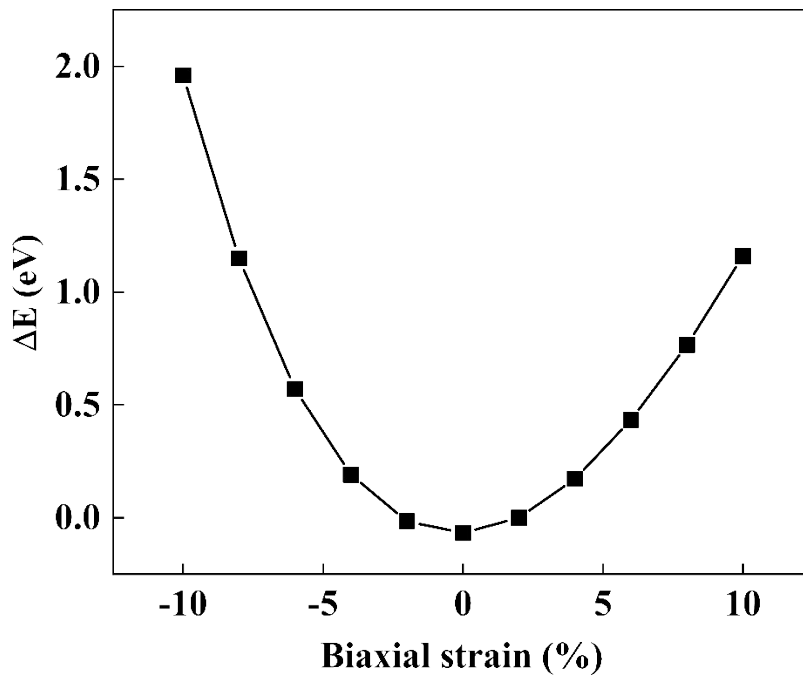

Figure S1. Strain-energy curve under biaxial strain applied within  $\pm 10\%$ .
